# Supplementary material for: Light dependent courtship behavior in Drosophila simulans and D. melanogaster
Source: PeerJ. 2020 Jul 16;8:e9499. doi: 10.7717/peerj.9499 (PMC7369021; doi:10.7717/peerj.9499)
Supplement: Supplemental Information 1 — Data is split by species, time point, and strain. The number of mated pairs of the total vials set up is provided in both the dark and the light treatments. The light dependent copulation success (Pdark/Plight) is calculated by dividing the proportion of successful copulations in the dark by the proportion of successful copulations in the light. Also provided are the p-value’s for within strain comparisons after correcting for multiple copmparisons. [file peerj-08-9499-s001.xlsx]

## Sheet: Table S1
Table S1.	The proportion of pairs that copulated. Data is split by species, time point, and strain. The number of mated
pairs of the total vials set up is provided in both the dark and the light treatments. The light dependent copulation success
(Pdark/Plight) is calculated by dividing the proportion of successful copulations in the dark by the proportion of successful
copulations in the light. Also provided are the p-value's for within strain comparisons after correcting for multiple copmparisons
(11 comparisons per species per exposure time).
Species	Treatment	Time	Genotype	Total mated	Total virgin	N	Prop. Total mated	Pdark/Plight	Fisher's uncorrected p-value	Fisher's corrected p-value
D. simulans	Dark	2 hours	AUS004	3	27	30	0.1
D. simulans	Light	2 hours	AUS004	14	16	30	0.466667	0.214286	0.003421	0.013684
D. simulans	Dark	2 hours	FLO166	16	14	30	0.533333
D. simulans	Light	2 hours	FLO166	25	5	30	0.833333	0.64	0.02506	0.07518
D. simulans	Dark	2 hours	GEO288	3	27	30	0.1
D. simulans	Light	2 hours	GEO288	15	15	30	0.5	0.2	0.001506	0.00753
D. simulans	Dark	2 hours	GRE181	9	21	30	0.3
D. simulans	Light	2 hours	GRE181	26	4	30	0.866667	0.346154	1.606e-05	0.0001606
D. simulans	Dark	2 hours	GUY001	13	17	30	0.433333
D. simulans	Light	2 hours	GUY001	26	4	30	0.866667	0.5	0.0009162	0.0054972
D. simulans	Dark	2 hours	MAD196	8	22	30	0.266667
D. simulans	Light	2 hours	MAD196	17	13	30	0.566667	0.470588	0.03522	0.07518
D. simulans	Dark	2 hours	MAL261	26	4	30	0.866667
D. simulans	Light	2 hours	MAL261	30	0	30	1	0.866667	0.1124	0.1124
D. simulans	Dark	2 hours	NG009	5	25	30	0.166667
D. simulans	Light	2 hours	NG009	19	11	30	0.633333	0.263158	0.0004809	0.0033663
D. simulans	Dark	2 hours	NUE006	18	12	30	0.6
D. simulans	Light	2 hours	NUE006	30	0	30	1	0.6	0.0001236	0.0009888
D. simulans	Dark	2 hours	PER005	11	19	30	0.366667
D. simulans	Light	2 hours	PER005	27	3	30	0.9	0.407407	3.325e-05	0.00029925
D. simulans	Dark	2 hours	SA169	2	28	30	0.0666667
D. simulans	Light	2 hours	SA169	23	7	30	0.766667	0.0869565	3.481e-08	3.8291e-07
D. simulans	Dark	6 hours	AUS004	7	23	30	0.233333
D. simulans	Light	6 hours	AUS004	24	6	30	0.8	0.291667	2.267e-05	0.00024937
D. simulans	Dark	6 hours	FLO166	28	2	30	0.933333
D. simulans	Light	6 hours	FLO166	27	4	31	0.870968	1.0716	0.6713	1
D. simulans	Dark	6 hours	GEO288	8	22	30	0.266667
D. simulans	Light	6 hours	GEO288	18	12	30	0.6	0.444444	0.01824	0.14592
D. simulans	Dark	6 hours	GRE181	16	14	30	0.533333
D. simulans	Light	6 hours	GRE181	28	2	30	0.933333	0.571429	0.0009098	0.0081882
D. simulans	Dark	6 hours	GUY001	28	2	30	0.933333
D. simulans	Light	6 hours	GUY001	26	4	30	0.866667	1.07692	0.6707	1
D. simulans	Dark	6 hours	MAD196	18	12	30	0.6
D. simulans	Light	6 hours	MAD196	17	13	30	0.566667	1.05882	1	1
D. simulans	Dark	6 hours	MAL261	29	1	30	0.966667
D. simulans	Light	6 hours	MAL261	30	0	30	1	0.966667	1	1
D. simulans	Dark	6 hours	NG009	16	14	30	0.533333
D. simulans	Light	6 hours	NG009	25	5	30	0.833333	0.64	0.02506	0.17542
D. simulans	Dark	6 hours	NUE006	30	0	30	1
D. simulans	Light	6 hours	NUE006	27	3	30	0.9	1.11111	0.2373	1
D. simulans	Dark	6 hours	PER005	27	3	30	0.9
D. simulans	Light	6 hours	PER005	29	2	31	0.935484	0.962069	0.6713	1
D. simulans	Dark	6 hours	SA169	7	22	29	0.241379
D. simulans	Light	6 hours	SA169	23	7	30	0.766667	0.314843	7.641e-05	0.0007641
D. melanogaster	Dark	2 hours	M-AUS05	12	18	30	0.4
D. melanogaster	Light	2 hours	M-AUS05	30	0	30	1	0.4	1.87e-07	2.057e-06
D. melanogaster	Dark	2 hours	M-BRAZ15	29	1	30	0.966667
D. melanogaster	Light	2 hours	M-BRAZ15	30	0	30	1	0.966667	1	1
D. melanogaster	Dark	2 hours	M-FLO14	25	4	29	0.862069
D. melanogaster	Light	2 hours	M-FLO14	29	0	29	1	0.862069	0.112	0.33616
D. melanogaster	Dark	2 hours	M-GEO181	19	11	30	0.633333
D. melanogaster	Light	2 hours	M-GEO181	25	5	30	0.833333	0.76	0.1432	0.33616
D. melanogaster	Dark	2 hours	M-GRE69	16	14	30	0.533333
D. melanogaster	Light	2 hours	M-GRE69	27	3	30	0.9	0.592593	0.003421	0.027368
D. melanogaster	Dark	2 hours	M-MAD125	14	16	30	0.466667
D. melanogaster	Light	2 hours	M-MAD125	26	4	30	0.866667	0.538462	0.002152	0.019368
D. melanogaster	Dark	2 hours	M-MAL76	14	16	30	0.466667
D. melanogaster	Light	2 hours	M-MAL76	25	5	30	0.833333	0.56	0.006107	0.036642
D. melanogaster	Dark	2 hours	M-NG120	7	23	30	0.233333
D. melanogaster	Light	2 hours	M-NG120	22	8	30	0.733333	0.318182	0.0002309	0.002309
D. melanogaster	Dark	2 hours	M-PER01	22	8	30	0.733333
D. melanogaster	Light	2 hours	M-PER01	29	1	30	0.966667	0.758621	0.02569	0.12845
D. melanogaster	Dark	2 hours	M-SA51	18	12	30	0.6
D. melanogaster	Light	2 hours	M-SA51	25	5	30	0.833333	0.72	0.08404	0.33616
D. melanogaster	Dark	2 hours	M-SD131	22	8	30	0.733333
D. melanogaster	Light	2 hours	M-SD131	30	0	30	1	0.733333	0.004575	0.032025
D. melanogaster	Dark	6 hours	M-AUS05	19	6	25	0.76
D. melanogaster	Light	6 hours	M-AUS05	25	1	26	0.961538	0.7904	0.04961	0.39688
D. melanogaster	Dark	6 hours	M-BRAZ15	25	5	30	0.833333
D. melanogaster	Light	6 hours	M-BRAZ15	29	1	30	0.966667	0.862069	0.1945	1
D. melanogaster	Dark	6 hours	M-FLO14	24	3	27	0.888889
D. melanogaster	Light	6 hours	M-FLO14	27	0	27	1	0.888889	0.2358	1
D. melanogaster	Dark	6 hours	M-GEO181	26	4	30	0.866667
D. melanogaster	Light	6 hours	M-GEO181	29	1	30	0.966667	0.896552	0.3533	1
D. melanogaster	Dark	6 hours	M-GRE69	22	8	30	0.733333
D. melanogaster	Light	6 hours	M-GRE69	26	4	30	0.866667	0.846154	0.3334	1
D. melanogaster	Dark	6 hours	M-MAD125	19	10	29	0.655172
D. melanogaster	Light	6 hours	M-MAD125	31	0	31	1	0.655172	0.0002657	0.002657
D. melanogaster	Dark	6 hours	M-MAL76	24	6	30	0.8
D. melanogaster	Light	6 hours	M-MAL76	27	3	30	0.9	0.888889	0.4716	1
D. melanogaster	Dark	6 hours	M-NG120	11	19	30	0.366667
D. melanogaster	Light	6 hours	M-NG120	24	3	27	0.888889	0.4125	8.843e-05	0.00097273
D. melanogaster	Dark	6 hours	M-PER01	24	6	30	0.8
D. melanogaster	Light	6 hours	M-PER01	29	0	29	1	0.8	0.02372	0.21348
D. melanogaster	Dark	6 hours	M-SA51	24	6	30	0.8
D. melanogaster	Light	6 hours	M-SA51	27	3	30	0.9	0.888889	0.4716	1
D. melanogaster	Dark	6 hours	M-SD131	26	4	30	0.866667
D. melanogaster	Light	6 hours	M-SD131	29	1	30	0.966667	0.896552	0.3533	1
