# Supplementary material for: Light dependent courtship behavior in Drosophila simulans and D. melanogaster
Source: PeerJ. 2020 Jul 16;8:e9499. doi: 10.7717/peerj.9499 (PMC7369021; doi:10.7717/peerj.9499)
Supplement: Supplemental Information 2 — The number of males that courted their own female types for two light-dependent and two light-independent strains (one D. melanogaster and one D. simulans for each). The corrected p-value for differences between treatments is shown. [file peerj-08-9499-s002.xlsx]

## Sheet: Table S2
Table S2A.	The proportion of males displaying courtship towards their own females in the light and in the dark.
The number of males that courted their own female types for two light-dependent and two light-independent strains
(one D. melanogaster and one D. simulans for each). The corrected p-value for differences between treatments is shown
Male	Female	Treatment	Courted	Didn't court	Total	Prop	Diff	Fisher's corrected p-value
M-NG120	M-NG120	Light	5	5	10	0.5
M-NG120	M-NG120	Dark	3	7	10	0.3	0.2	0.9474
M-BRAZ15	M-BRAZ15	Light	10	0	10	1
M-BRAZ15	M-BRAZ15	Dark	8	2	10	0.8	0.2	0.9474
MAL261	MAL261	Light	4	0	4	1
MAL261	MAL261	Dark	5	2	7	0.714286	0.285714	0.4909
SA169	SA169	Light	4	0	4	1
SA169	SA169	Dark	1	6	7	0.142857	0.857143	0.0303
Table S2B.	The proportion of males displaying courtship towards each other's females in the light and in the dark.
The number of males that courted the other female types for two light-dependent and two light-independent strains
(one D. melanogaster and one D. simulans for each). The corrected p-value for differences between treatments is shown
Male	Female	Treatment	Courted	Didn't court	Total	Prop	Diff	Fisher's corrected p-value
MAL261	SA169	Light	2	1	3	0.666667
MAL261	SA169	Dark	3	1	4	0.75	-0.0833333	1
SA169	MAL261	Light	3	0	3	1
SA169	MAL261	Dark	3	0	3	1	0	1
